# Supplementary material for: Hybridization of inorganic CoB noncrystal with graphene and its Kubas-enhanced hydrogen adsorption at room temperature
Source: Royal Society of Chemistry journal article supplement (doi:10.1039/c6ra19238f), 2016-01-01
Supplement: c6ra19238f1.pdf [file c6ra19238f1.pdf]

## Supporting Information

### Hybridization of inorganic CoB noncrystal with graphene and its Kubas-enhanced hydrogen adsorption at room temperature

*Xiaobo Li,<sup>[a]‡</sup> Shuchao Sun,<sup>[a]‡</sup> Jianjiao Zhang,<sup>[a]</sup> Kan Luo,<sup>[b]</sup> Peng Gao,<sup>\*[a]</sup> Tingting Wu,<sup>[a]</sup> Shiyu Du,<sup>\*[b]</sup> Ying Wang,<sup>[a]</sup> Xiaoming Zhou,<sup>[a]</sup> Linna Sha,<sup>[a]</sup> Yurong Yang,<sup>[a]</sup> Piaoping Yang,<sup>\*[a]</sup> Yanbo Wang,<sup>[a]</sup> and Yujin Chen<sup>\*[c]</sup>*

X. B. Li, J. J. Zhang, Prof. P. Gao, T. T. Wu, Y. Wang, X. M. Zhou, S. C. Sun, L. N. Sha, Y. R. Yang, Prof. P. P. Yang and Y. B. Wang

Key Laboratory of Superlight Materials and Surface Technology, Ministry of Education, College of Material Sciences and Chemical Engineering, Harbin Engineering University

Harbin, Heilongjiang, 150001, P. R. China

E-mail: gaopeng@hrbeu.edu.cn; yangpiaoping@hrbeu.edu.cn.

K. Luo and Prof S. Y. Du

Engineering Laboratory of Specialty Fibers and Nuclear Energy Materials, Ningbo Institute of Industrial Technology, Chinese Academy of Sciences

Ningbo, Zhejiang 315201, P. R. China

E-mail: dushiyu@nimte.ac.cn

Prof. Y. J. Chen

College of Science, Harbin Engineering University

Harbin, Heilongjiang, 150001, P. R. China

E-mail: chen yujin@hrbeu.edu.cn.

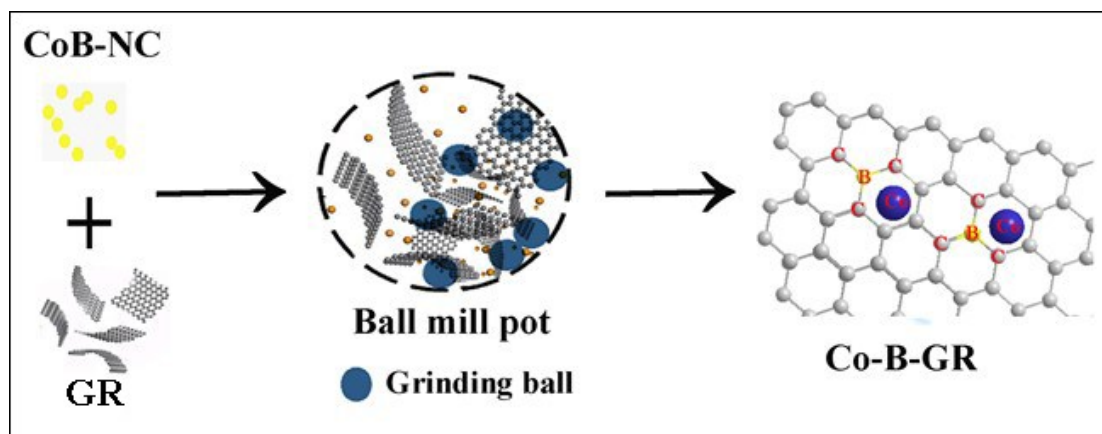

**Scheme S1.** Illustration of the formation process of Co-B-GR with a ball-milling method.

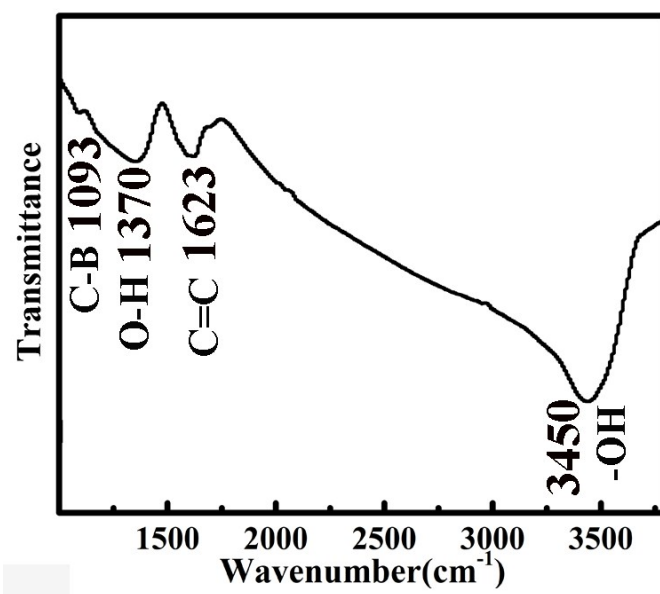

Figure S1. FT-IR spectrum of the as-obtained Co-B-GR.

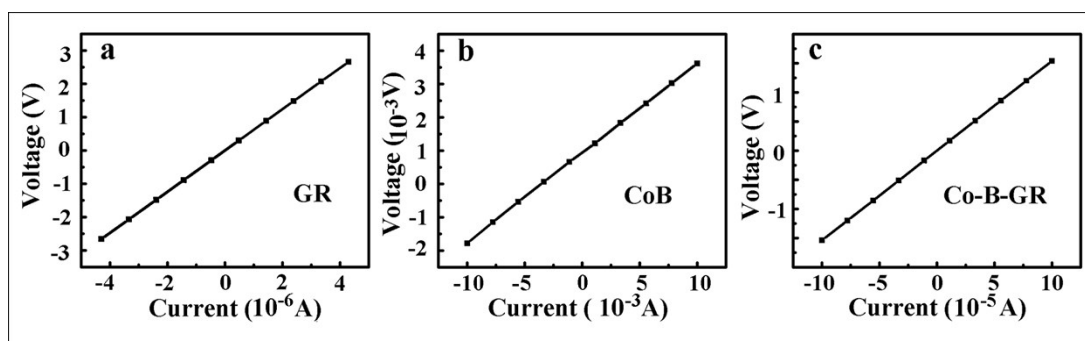

**Figure S2.** Electrical conductivities of amorphous GR and CoB reactants, and the Co-B-GR hybrid product.
